# Supplementary material for: Differentiating local and regional sources of Chinese urban air pollution based on the effect of the Spring Festival
Source: Copernicus journal article supplement (doi:10.5194/acp-17-9103-2017), 2017-07-27
Supplement: Supplementary file 1 [file acp-17-9103-2017-supplement.zip]

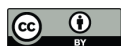

*Supplement of*

**Differentiating local and regional sources of Chinese urban air pollution based on the effect of the Spring Festival**

**Chuan Wang et al.**

*Correspondence to:* Xiao-Feng Huang ([huangxf@pku.edu.cn](mailto:huangxf@pku.edu.cn))

- [acp-17-9103-2017-supplement-title-page.pdf](#)
- [acp-2017-173-Supplement -author proofreading.docx](#)

The copyright of individual parts of the supplement might differ from the CC BY 3.0 License.
